# Supplementary material for: Association of Vitamin D With Insulin Resistance and β-Cell Dysfunction in Subjects at Risk for Type 2 Diabetes
Source: PubMed Central journal article supplement — Diabetes Care. 2010 Mar 9;33(6):1379–81. doi: 10.2337/dc09-2321 (PMC2875459; doi:10.2337/dc09-2321), 2010-03-09
Supplement: supp_dc09-2321_onlineappendix.pdf [file supp_dc09-2321_onlineappendix.pdf]

**Table A1.** Baseline participant characteristics by 25(OH)D quartiles, PROMISE cohort study

|                                    |                                                     | Serum 25(OH)D concentration (nmol/L) |                            |                            |                            | p value* | Spearman correlation |         |
|------------------------------------|-----------------------------------------------------|--------------------------------------|----------------------------|----------------------------|----------------------------|----------|----------------------|---------|
|                                    |                                                     | Q1<br>(≤ 39.40)                      | Q2<br>(39.41 – 53.55)      | Q3<br>(53.56 – 70.30)      | Q4<br>(70.31 – 161.00)     |          | r value              | p value |
| n (%)                              |                                                     | 175 (25.22)                          | 172 (24.78)                | 176 (25.36)                | 171 (24.64)                |          |                      |         |
| Age (years)                        |                                                     | 46.86                                | 48.65                      | 51.18                      | 51.69                      | <0.0001  | 0.18                 | <0.0001 |
| Sex                                | Males                                               | 52 (24.88)                           | 56 (26.79)                 | 50 (23.92)                 | 51 (24.40)                 | 0.86     |                      |         |
|                                    | Females                                             | 123 (25.36)                          | 116 (23.92)                | 126 (25.98)                | 120 (24.74)                |          |                      |         |
| Ethnicity                          | Caucasian                                           | 86 (19.03)                           | 103 (22.79)                | 127 (28.10)                | 136 (30.09)                | <0.0001  |                      |         |
|                                    | Hispanic                                            | 30 (28.85)                           | 37 (35.58)                 | 25 (24.04)                 | 12 (11.54)                 |          |                      |         |
|                                    | South Asian                                         | 25 (48.08)                           | 11 (21.15)                 | 11 (21.15)                 | 5 (9.62)                   |          |                      |         |
|                                    | Other                                               | 34 (39.53)                           | 21 (24.42)                 | 13 (15.12)                 | 18 (20.93)                 |          |                      |         |
| Smoking (% current)                |                                                     | 14 (28.57)                           | 10 (20.41)                 | 15 (30.61)                 | 10 (20.41)                 | 0.93     |                      |         |
| Anthropometry                      | BMI (kg/m <sup>2</sup> )                            | 32.29<br>(28.84, 37.28)              | 31.16<br>(27.38, 35.31)    | 29.71<br>(25.96, 32.86)    | 29.10<br>(25.84, 32.67)    | <0.0001  | -0.25                | <0.0001 |
|                                    | Waist circumference (cm)                            | 104.05 ± 14.94                       | 99.23 ± 15.42              | 96.44 ± 15.43              | 95.08 ± 14.72              | <0.0001  | -0.21                | <0.0001 |
| Parathyroid Hormone (PTH) (pmol/L) |                                                     | 5.06 ± 2.03                          | 4.76 ± 1.67                | 4.30 ± 1.57                | 4.23 ± 1.39                | <0.0001  | -0.20                | <0.0001 |
| Family history of DM (%)           |                                                     | 110 (25.52)                          | 105 (24.36)                | 111 (25.75)                | 105 (24.36)                | 0.90     |                      |         |
| Total activity (MET-h/wk)          | (leisure + occupational)                            | 25.87<br>(8.77, 61.05)               | 28.62<br>(10.89, 74.15)    | 35.60<br>(13.15, 100.16)   | 36.78<br>(17.56, 88.04)    | 0.0031   | 0.15                 | 0.0002  |
| Supplement Use                     | Multi-vitamin (n=265, 42.46%)                       | 39 (15.42)                           | 48 (18.97)                 | 79 (31.23)                 | 87 (34.39)                 | <0.0001  |                      |         |
|                                    | Vitamin D (n=93, 14.83%)                            | 17 (18.89)                           | 13 (14.44)                 | 27 (30.00)                 | 33 (36.67)                 | 0.0183   |                      |         |
|                                    | Vitamin D + Calcium (n=77, 12.28%)                  | 5 (6.58)                             | 15 (19.74)                 | 24 (31.58)                 | 32 (42.11)                 | <0.0001  |                      |         |
|                                    | Calcium (n=134, 21.37%)                             | 21 (16.15)                           | 27 (20.77)                 | 41 (31.54)                 | 41 (31.54)                 | 0.0312   |                      |         |
| Insulin Sensitivity                | IS OGTT index <sup>†</sup>                          | 9.21<br>(5.91, 14.58)                | 11.60<br>(7.47, 16.95)     | 14.37<br>(8.77, 22.95)     | 16.74<br>(10.75, 25.05)    | <0.0001  | 0.30                 | <0.0001 |
| Insulin Resistance                 | HOMA-IR <sup>‡</sup>                                | 2.77<br>(1.70, 4.26)                 | 2.21<br>(1.45, 3.56)       | 1.69<br>(1.09, 2.86)       | 1.46<br>(0.93, 2.34)       | <0.0001  | -0.29                | <0.0001 |
| Beta-cell Function                 | Insulinogenic index / HOMA-IR (IGI/IR) <sup>§</sup> | 7.22<br>(4.37, 1.97)                 | 7.50<br>(4.43, 12.65)      | 9.47<br>(4.90, 14.77)      | 10.42<br>(5.60, 17.00)     | 0.0024   | 0.14                 | 0.0002  |
| Beta-cell Function                 | ISSI-2 <sup>  </sup>                                | 641.93<br>(507.39, 803.45)           | 693.54<br>(526.07, 895.47) | 690.70<br>(528.74, 918.60) | 770.53<br>(572.23, 956.92) | 0.0024   | 0.14                 | 0.0002  |

Data are n (%) for categorical variables, mean  $\pm$  SD for continuous variables, or median (25% & 75% interquartiles) for non-normally distributed variables.

\*P values are tests for proportions for categorical variables or tests for equality among quartiles for continuous variables.

†The IS<sub>OGTT</sub> index is calculated as follows:  $10000 / \sqrt{(FPG * FPI) * (G * I)}$ , where FPG = fasting plasma glucose, FPI = fasting plasma insulin, G = mean glucose during the OGTT, and I = mean insulin during the OGTT (calculated from glucose and insulin samples at 0, 30 and 120 minutes). Glucose and insulin values were in SI units.

‡HOMA-IR is defined as  $FPG * FPI / 22.5$ , using SI and metric units for glucose and insulin values respectively

§IGI/IR is calculated as follows: the insulinogenic index ((30 min insulin - fasting insulin) / (30 min glucose - fasting glucose)) divided by HOMA-IR.

||ISSI-2 is defined as the product of the ratio of total area-under-the-insulin curve to total area-under-the-glucose curve and IS<sub>OGTT</sub>.

**Table A2. Association of Vitamin D with Measures of Insulin Resistance and Beta-Cell Function, Stratified by BMI**

| Outcome per unit increase in baseline 25(OH)D |                | Model 1*                   |            | Model 2†                   |            | Model 3‡                   |            |
|-----------------------------------------------|----------------|----------------------------|------------|----------------------------|------------|----------------------------|------------|
|                                               |                | $\beta$<br>(95% CI)        | P<br>value | $\beta$<br>(95% CI)        | P<br>value | $\beta$<br>(95% CI)        | P<br>value |
| IS-OGTT§                                      | BMI < 30       | 0.007<br>(0.004, 0.010)    | <0.0001    | 0.007<br>(0.004, 0.011)    | <0.0001    | 0.006<br>(0.002, 0.009)    | 0.001      |
|                                               | BMI $\geq$ 30¶ | 0.005<br>(0.002, 0.008)    | 0.002      | 0.004<br>(0.0002, 0.007)   | 0.04       | 0.003<br>(-0.001, 0.006)   | 0.13       |
| HOMA-IR§                                      | BMI < 30       | -0.007<br>(-0.010, -0.004) | <0.0001    | -0.007<br>(-0.011, -0.003) | 0.0002     | -0.005<br>(-0.008, -0.002) | 0.004      |
|                                               | BMI $\geq$ 30¶ | -0.005<br>(-0.008, -0.002) | 0.003      | -0.003<br>(-0.007, 0.001)  | 0.11       | -0.001<br>(-0.005, 0.002)  | 0.51       |
| IGI/IR§                                       | BMI < 30       | 0.007<br>(0.003, 0.012)    | 0.002      | 0.009<br>(0.004, 0.014)    | 0.0009     | 0.008<br>(0.003, 0.013)    | 0.003      |
|                                               | BMI $\geq$ 30¶ | 0.004<br>(-0.001, 0.008)   | 0.10       | 0.001<br>(-0.004, 0.007)   | 0.59       | -0.001<br>(-0.006, 0.005)  | 0.82       |
| ISSI-2§                                       | BMI < 30       | 0.004<br>(0.002, 0.006)    | 0.0006     | 0.005<br>(0.002, 0.007)    | 0.0001     | 0.004<br>(0.002, 0.007)    | 0.0007     |
|                                               | BMI $\geq$ 30¶ | 0.003<br>(0.001, 0.005)    | 0.008      | 0.002<br>(-0.001, 0.004)   | 0.14       | 0.001<br>(-0.002, 0.003)   | 0.45       |

\* Model 1: adjusted for age, sex, season, ethnicity

† Model 2: adjusted as in model 1 plus supplements, total physical activity, parathyroid hormone

‡ Model 3: adjusted as in model 2 plus BMI

§ Log transformations

|| n=345

¶ n=367
